# Supplementary material for: Self-assembled three-dimensional hierarchical porous V2O5/graphene hybrid aerogels for supercapacitors with high energy density and long cycle life
Source: Royal Society of Chemistry journal article supplement (doi:10.1039/c4ta05537c), 2014-11-26
Supplement: c4ta05537c1.pdf [file c4ta05537c1.pdf]

Electronic Supplementary Information (ESI)

**Self-assembled three-dimensional hierarchical porous V<sub>2</sub>O<sub>5</sub>/graphene hybrid aerogels for supercapacitors with high energy density and long cycle life**

Yingjie Wu, Guohua Gao\* and Guangming Wu\*

Shanghai Key Laboratory of Special Artificial Microstructure, Tongji University,

Shanghai, 200092, China

E-mail: gao@tongji.edu.cn; wugm@tongji.edu.cn

**Experimental Section:**

**Synthesis of V<sub>2</sub>O<sub>5</sub> sol:**

Functional V<sub>2</sub>O<sub>5</sub> sol was prepared from commercial V<sub>2</sub>O<sub>5</sub> powder through heating reflux. In a typical procedure, raw V<sub>2</sub>O<sub>5</sub> powder was immersed in benzyl alcohol and isopropanol (molar ration 1:4:40), and then the suspension was heated at 90 °C under a water-cooled condenser for 4 h over which the vanadium oxide (VO<sub>x</sub>) oligomers were formed. After filtration, unreacted V<sub>2</sub>O<sub>5</sub> was removed for recycling and the pale-yellow V<sub>2</sub>O<sub>5</sub> sol was obtained, in which V<sub>2</sub>O<sub>5</sub> content was about 40 mg ml<sup>-1</sup>.

**Preparation of V<sub>2</sub>O<sub>5</sub>/graphene hybrid aerogel:**

Graphene oxide (GO) was prepared from natural graphite flakes by a modified Hummers method.<sup>1</sup> GO aqueous dispersion (15 ml) was added into 10 ml as-prepared V<sub>2</sub>O<sub>5</sub> sol under vigorous stirring. After about 5 min, VO<sub>x</sub>/GO gel was obtained and the gel was then aged for 2 days at 50 °C. The obtained hydrogel was immersed in

acetone to completely replace residual water and solvents. Then, the wet gel was dried using supercritical CO<sub>2</sub> drying or freeze drying to yield the VO<sub>x</sub>/GO aerogel. At last, the as-prepared aerogel was annealed in air at 300 °C for 3 h to thermally reduce GO. For comparison, VO<sub>x</sub> aerogel (VO<sub>x</sub>-Ae) and V<sub>2</sub>O<sub>5</sub> aerogel (V<sub>2</sub>O<sub>5</sub>-Ae) were also obtained under same conditions but absence of GO.

### **Characterizations:**

The morphology of the samples were systematically investigated by field emission scanning electron microscopy (FESEM, S-4800), transmission electron microscopy (TEM, JEOL-2100) and high-resolution transmission electron microscopy (HRTEM, field emission JEOL-2100). X-ray powder diffraction (XRD) pattern was obtained by using a RigakuD/max-C diffractometer with Cu K $\alpha$  radiation source ( $\lambda = 1.5406 \text{ \AA}$ ). Fourier transform infrared spectroscopy (FTIR) was measured using a Bruker-TENSOR27 FTIR spectrometer over the range from 400 to 4000 cm<sup>-1</sup>. Raman spectra (Jobin-Yvon HR800) was recorded from 100 to 2000 cm<sup>-1</sup> using a 514 nm argon ion laser. The thermogravimetry analysis (TGA) and differential thermogravimetry analysis (DTG) were carried out on a SDT Q600 over the temperature range from 50 to 650 °C using a heating rate of 10 °C min<sup>-1</sup> under air atmosphere. Nitrogen adsorption isotherms for calculating the Brunauer-Emmett-Teller (BET) surface area were measured using an Autosorb-1 (Quantachome) analyzer.

### **Electrochemical Measurements:**

A symmetric two-electrode system was used to measure the electrochemical behavior of as-prepared electrode materials. The electrode was prepared by mixing 80% of the active materials, 10% carbon black and 10% poly (vinylidene fluoride) (PVDF) dispersed in N-methylpyrrolidinone (NMP) to form slurry. The obtained mixture was coated onto graphite papers with an area of 1 cm<sup>2</sup> and then dried at 120 °C for 12 h under vacuum to remove the solvent. The cyclic voltammetry (CV) and galvanostatic charge/discharge measurements were carried out by a CHI 660C electrochemical workstation over the potential range from -1 to 1 V. Electrochemical impedance spectroscopy (EIS) measurements were carried out in a frequency range of 0.01 Hz to 100 kHz with AC amplitude of 5 mV by using CHI 660C electrochemical workstation. The electrolyte used in all of the above measurements was a 1 M Na<sub>2</sub>SO<sub>4</sub> aqueous solution. The specific capacitance for a single electrode was calculated from the galvanostatic discharge curves as  $C = 2I\Delta t/\Delta V$ , where I is the constant discharging current density,  $\Delta t$  is the discharging time and  $\Delta V$  is the potential window. Energy density and power density were calculated by using the formula  $E = 1/8C(\Delta V)^2$  and  $P = E/\Delta t$ .

**Scheme S1.** Possible chemical reactions in the formation and hydrolysis of  $V_2O_5$  sol.

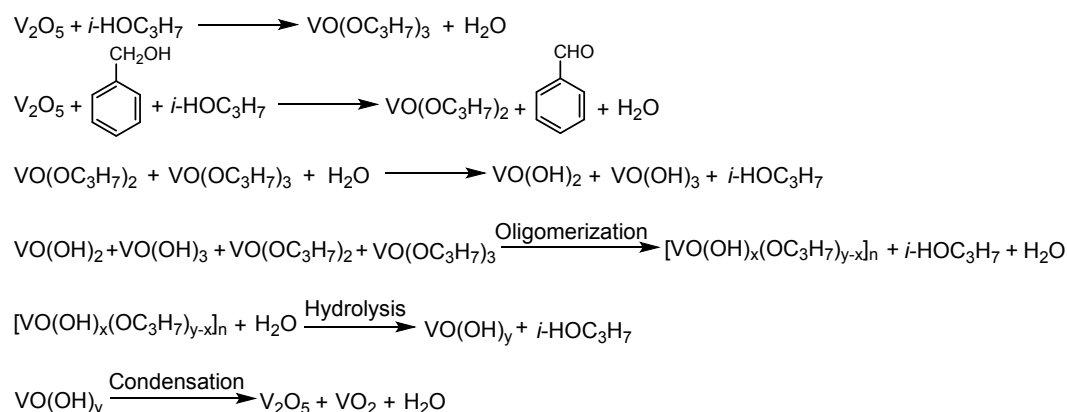

In the process of reaction, benzyl alcohol as a reducing agent and isopropyl alcohol as the solvent,  $[\text{VO}(\text{OH})_x(\text{OC}_3\text{H}_7)_{y-x}]_n$  ( $3 \geq y \geq 2$ ,  $y \geq x \geq 0$ ) (for convenience, denoted as  $\text{VO}_x$ ) oligomers are obtained during the complicated chemical reactions.<sup>3</sup> There are lots of  $V^{4+}$  in the sol acting as initiator of polymerization and that is why our functional sol is highly active.<sup>4</sup> It is worth noting that, because as-prepared  $V_2O_5$  sol is so sensitive to water that hydrolysis can happen rapidly even in air, it is difficult to make further characterization of our  $V_2O_5$  sol. But the color (light yellow) of sol and final production ( $V_2O_5$ ) are consistent with our hypothesis and demonstrate that  $V_2O_5$  powder is successfully converted into functional  $V_2O_5$  sol, which provides a low-cost alternative for relatively expensive vanadium precursors.<sup>5</sup>

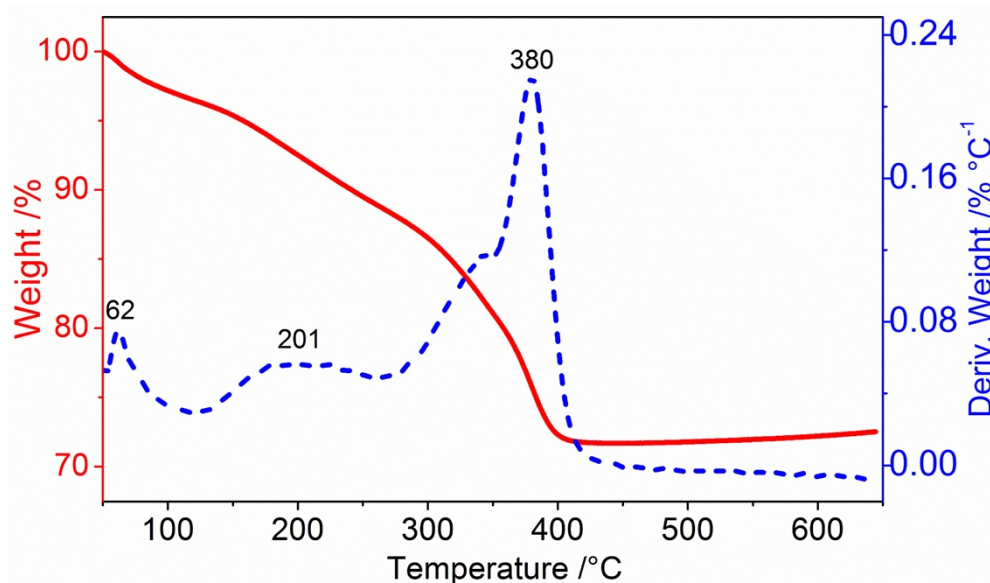

**Fig. S1.** TGA-DTG curves of  $V_2O_5$ /GN hybrid aerogel in air. The weight loss at 62, 201 and 380 °C can be attributed to the evaporation of solvent, decomposition of oxygen-containing functional groups of GO and crystallization of vanadium oxide, respectively.<sup>6, 7</sup> The weight gain after 420 °C is due to the oxidation of low valence  $V^{4+}$  to high valence  $V^{5+}$  in air, but it does not mean the oxidation reaction only occurs at temperature higher than 420 °C. In fact, 300 °C is enough for the oxidation of  $V^{4+}$ , which is corresponding to our experimental results that green  $VO_x$  and  $VO_x$ /GO aerogel change into yellow  $V_2O_5$  and  $V_2O_5$ /GN composite aerogel at 300 °C in air.<sup>8</sup>

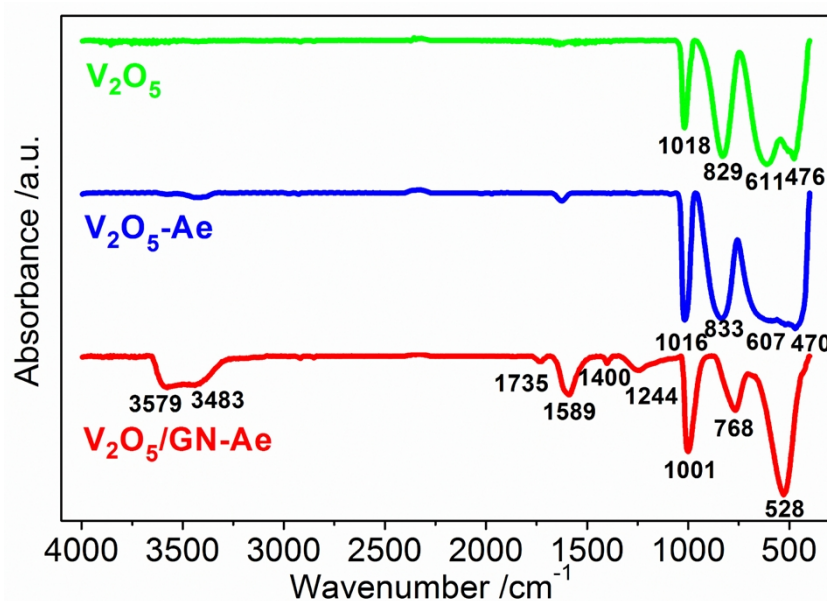

**Fig. S2.** FTIR spectra of V<sub>2</sub>O<sub>5</sub> powder, V<sub>2</sub>O<sub>5</sub> aerogel and V<sub>2</sub>O<sub>5</sub>/GN composite aerogel.

The characteristic peaks of vanadium oxide for V<sub>2</sub>O<sub>5</sub> powder appear at 1018, 829, 611 and 476 cm<sup>-1</sup> are corresponding to the stretching vibration of terminal oxygen bonds (V=O), the vibration of doubly coordinated oxygen (bridge oxygen) bonds and the asymmetric and symmetric stretching vibrations of triply coordinated oxygen (chain oxygen) bonds, respectively.<sup>9</sup> The position of adsorption peaks for V<sub>2</sub>O<sub>5</sub> aerogel are consist with commercial V<sub>2</sub>O<sub>5</sub> powder, which clearly demonstrates that the transformation of our functional sol into V<sub>2</sub>O<sub>5</sub> is feasible. For V<sub>2</sub>O<sub>5</sub>/GN aerogel composite, the characteristic adsorption peaks of vanadium oxide are shifted, indicating the strong interaction of V<sub>2</sub>O<sub>5</sub> and graphene.<sup>10</sup> The bond at 1589 cm<sup>-1</sup> is clearly observed, which belongs to the skeletal vibration of graphene sheets.<sup>11</sup>

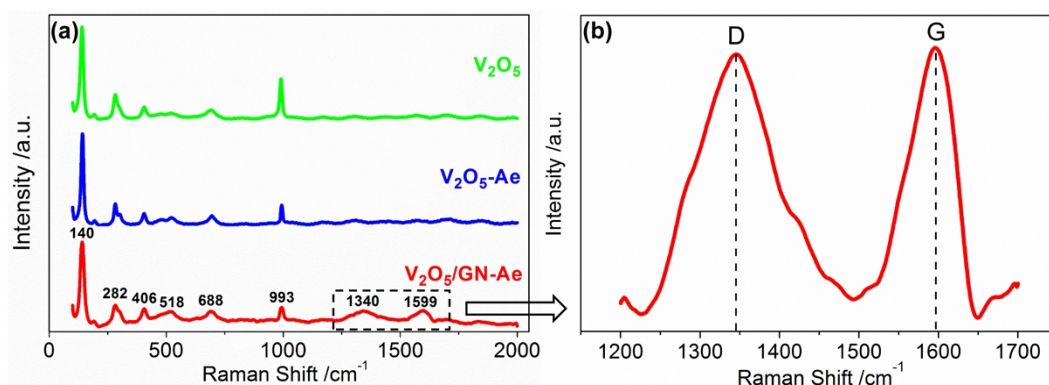

**Fig. S3.** (a, b) Raman spectra of  $V_2O_5$  powder, as-prepared  $V_2O_5$  aerogel and  $V_2O_5$ /GN hybrid aerogel. There are six peaks at 140, 282, 406, 518, 688 and 993  $cm^{-1}$  for both  $V_2O_5$ ,  $V_2O_5$  aerogel and  $V_2O_5$ /GN hybrid aerogel corresponding to the skeleton bending vibration of the V-O-V bonds, bending vibrations of V=O bonds, bending vibrations of bridge oxygen bonds, stretching vibrations of triply coordinated oxygen bonds, stretching vibrations of doubly coordinated oxygen and in-phase stretching vibrational of V=O bonds, respectively.<sup>10</sup> These same characteristic peaks of  $V_2O_5$  indicate the presence of  $V_2O_5$  in the three materials. In addition, for  $V_2O_5$ /GN composite aerogel, the characteristic D and G bands of graphene also appear at 1340 and 1599  $cm^{-1}$ , respectively.<sup>12</sup> Thus, the reduction of graphene oxide and incorporation with  $V_2O_5$  are confirmed.

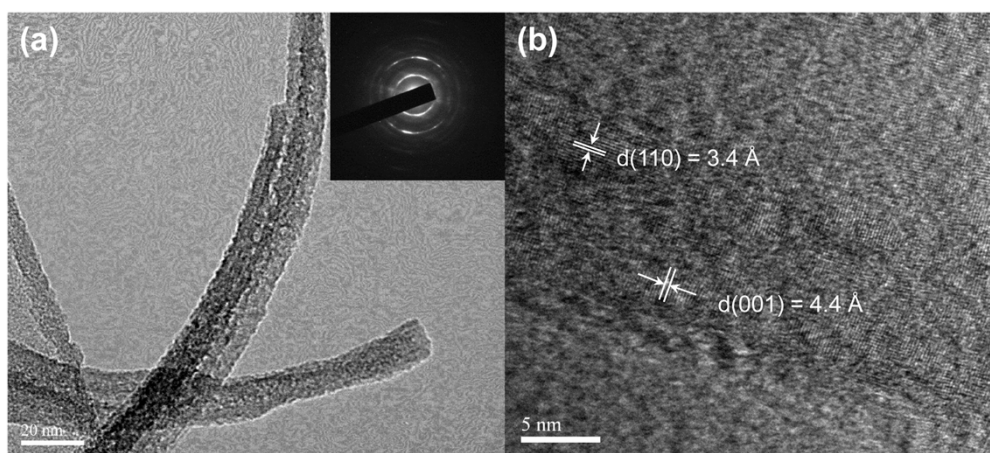

**Fig. S4.** (a) TEM image and SAED patterns (inset) of VO<sub>x</sub> nanofibers. These fibers with length of several micrometers and dozens of nanometers in diameter are noncrystalline. (b) High-resolution TEM (HRTEM) image of V<sub>2</sub>O<sub>5</sub> nanofibers. The distinct lattice fringes further confirm partly crystallization of V<sub>2</sub>O<sub>5</sub> during thermal treatment.



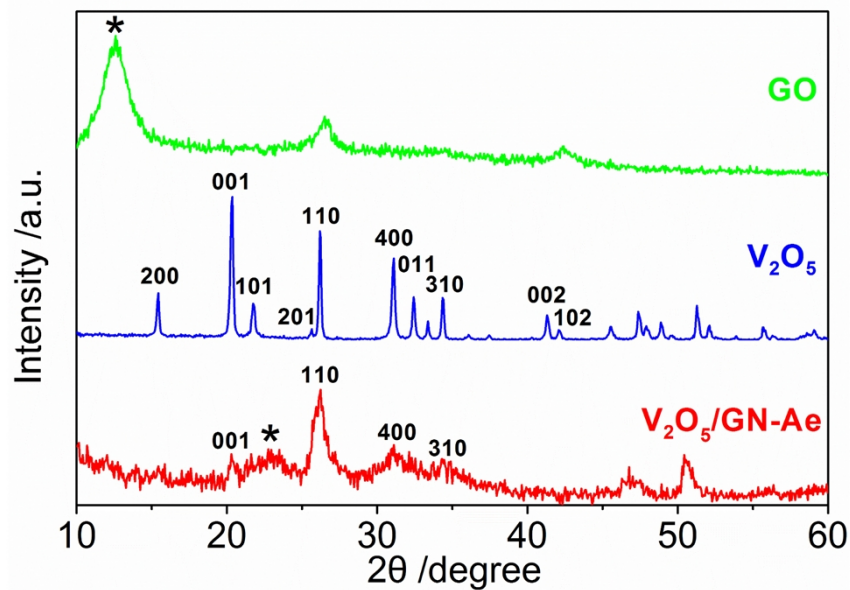

**Fig. S5.** XRD patterns of graphene oxide (GO), raw  $V_2O_5$  powder and  $V_2O_5$ /GN hybrid aerogel. The commercial  $V_2O_5$  powder has an orthorhombic structure (JCPDS no. 41-1426). The XRD patterns of  $V_2O_5$ /GN composite aerogel exhibit a (002) reflection peak of graphene at  $23^\circ$ , which suggests that graphene sheets in the composite aerogel are few layers thick.<sup>13</sup> Besides, the presence of (001), (110), (400) and (310) reflection peaks of  $V_2O_5$  indicates that the obtained hybrid aerogel is partly crystalline after thermal treatment, which is consistent with the results of thermogravimetric analysis.

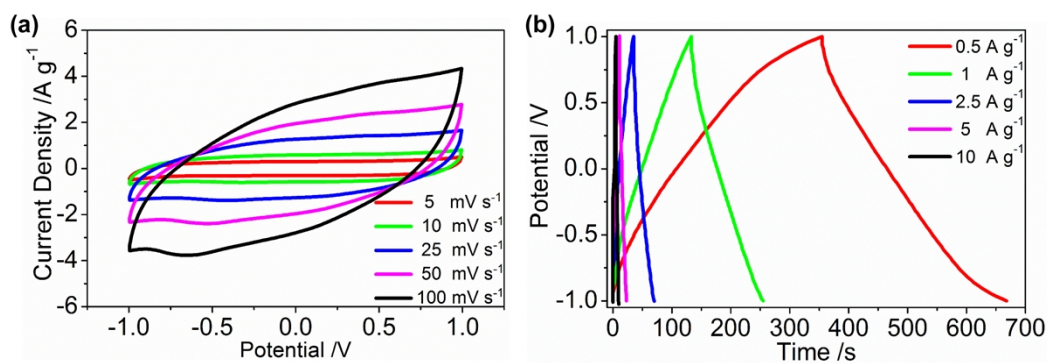

**Fig. S6.** (a) CV curves of  $V_2O_5$  powder tested at different scan rates and (b) Galvanostatic charge/discharge of  $V_2O_5$  powder evaluated at different current densities.

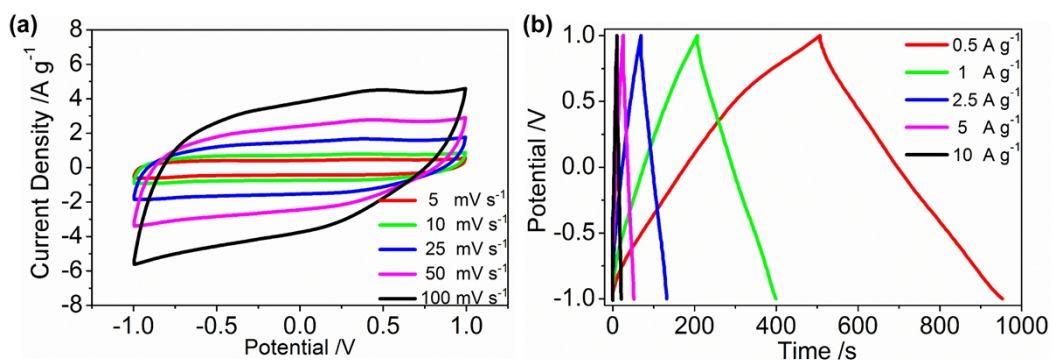

**Fig. S7.** (a) CV curves of  $V_2O_5$  aerogel tested at different scan rates and (b) Galvanostatic charge/discharge of  $V_2O_5$  aerogel evaluated at different current densities.

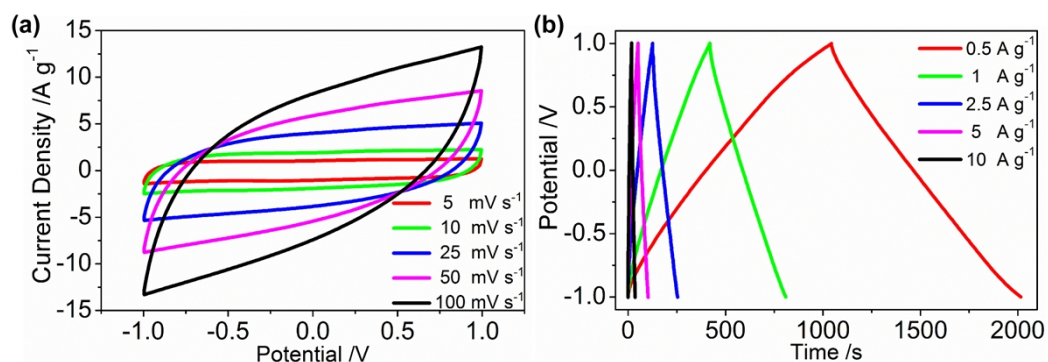

**Fig. S8.** (a) CV curves of  $V_2O_5/GN$  composite aerogel tested at different scan rates and (b) Galvanostatic charge/discharge of  $V_2O_5/GN$  aerogel evaluated at different current densities.

## References:

- 1 W. S. Jr. Hummers and R. E. Offeman, *J. Am. Chem. Soc.*, 1958, **80**, 1339.
- 2 L. L. Zhang, X. Zhao, M. D. Stoller, Y. W. Zhu, H. X. Ji, S. Murali, Y. P. Wu, S. Perales, B. Clevenger and R. S. Ruoff, *Nano Lett.*, 2012, **12**, 1806.
- 3 M. K. Atal, V. Dhayal, M. Nagar, R. Bohra, K. S. Rathore and N. S. Saxena, *J. Sol-Gel Sci. Technol.*, 2010, **53**, 67.
- 4 J. Livage, *Chem. Mater.*, 1991, **3**, 578.
- 5 J. Livage, *Solid State Ionics*, 1996, **86**, 935.
- 6 S. Stankovich, D. A. Dikin, R. D. Piner, K. A. Kohlhaas, A. Kleinhammes, Y. Y. Jia, Y. Wu, S. T. Nguyen and R. S. Ruoff, *Carbon*, 2007, **45**, 1558.
- 7 X. W. Zhou, G. M. Wu, G. H. Gao, J. C. Wang, H. Y. Yang, J. D. Wu, J. Shen, B. Zhou and Z. H. Zhang, *J. Phys. Chem. C*, 2012, **116**, 21685.
- 8 Z.-L. Wang, D. Xu, Y. Huang, Z. Wu, L.-M. Wang and X.-B. Zhang, *Chem. Commun.*, 2012, **48**, 976.
- 9 X. W. Zhou, G. M. Wu, J. D. Wu, H. Y. Yang, J. C. Wang, G. H. Gao, R. Cai and Q. Y. Yan, *J. Mater. Chem. A*, 2013, **1**, 15459.
- 10 H. W. Wang, H. Yi, X. Chen and X. F. Wang, *J. Mater. Chem. A*, 2014, **2**, 1165.
- 11 J. L. Wang, Z. X. Shi, J. C. Fan, Y. Ge, J. Yin and G. X. Hu, *J. Mater. Chem.*, 2012, **22**, 22459.
- 12 Y. W. Zhu, S. Murali, W. W. Cai, X. S. Li, J. W. Suk, J. R. Potts and R. S. Ruoff, *Adv. Mater.*, 2010, **22**, 3906.
- 13 H. Hu, Z. B. Zhao, W. B. Wan, Y. Gogotsi and J. S. Qiu, *Adv. Mater.*, 2013, **25**, 2219.
